# Supplementary material for: Enalapril Diminishes the Diabetes-Induced Changes in Intestinal Morphology, Intestinal RAS and Blood SCFA Concentration in Rats
Source: MDPI journal article supplement (doi:10.3390/ijms23116060), 2022-05-27
Supplement: s1 [file s1]

## SUPPLEMENTARY MATERIALS

### Supplementary Results

#### *Histological morphometric analysis of the jejunum and colon*

In the jejunum, there were significant differences between the groups with respect to crypt depth ( $F_{2,18}=4.44$ ,  $p=0.027$ ) and height of the villi ( $F_{2,18}=7.50$ ,  $p=0.004$ ). Namely, diabetic group had increased crypt depth in comparison to control group and diabetic rats on water and enalapril (ACE-I group) showed significantly increased height of the villi compared to healthy control rats. There were no significant changes in the height of the enterocyte, the number of goblet cells (per 50 enterocytes), and the number of mitoses in crypts, Supplementary Figure 1.

In the colon, morphometric analysis revealed no significant differences in crypt depth, the height of the enterocyte, the number of goblet cells (per 50 enterocytes), and the number of mitoses in crypts between the groups, Supplementary Figure 2.

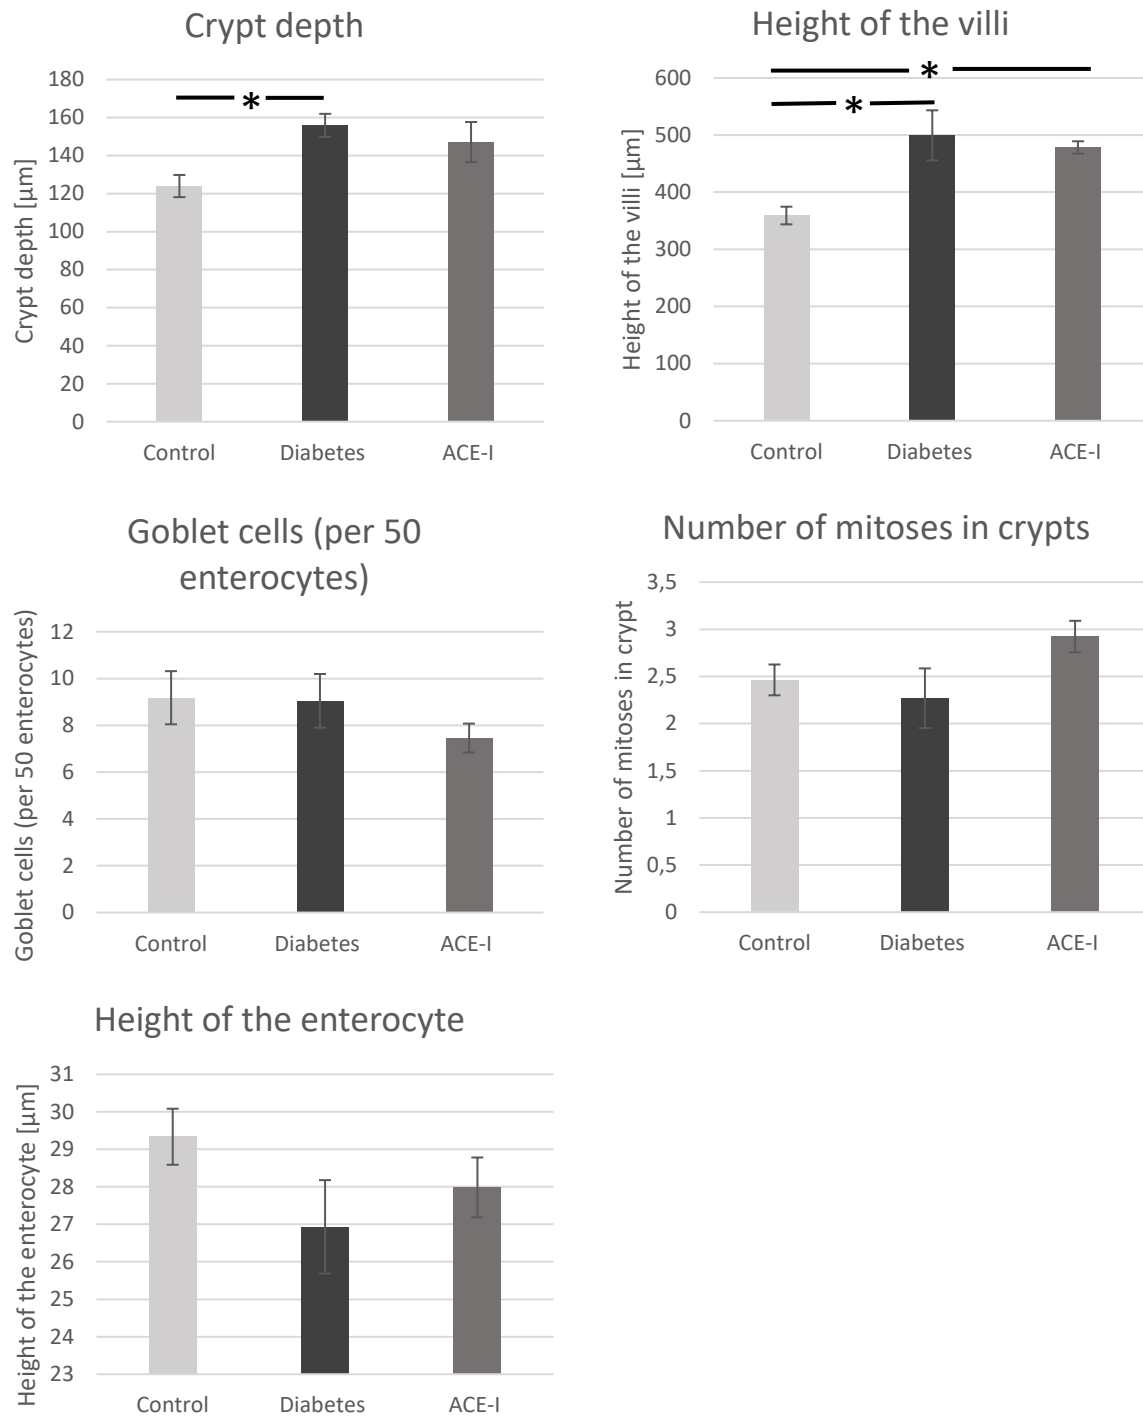

**Figure S1.** Histological morphometric analysis of the jejunum in rats of the control (n=7), diabetes (n=7) and ACE-I (n=7) groups. Diabetes group have been assessed 4 weeks after streptozotocin administration, ACE-I group are diabetic rats treated with enalapril for 4 weeks. Values are means  $\pm$  SE, \* -  $p < 0.05$ , by one-way ANOVA followed by Tukey's test.

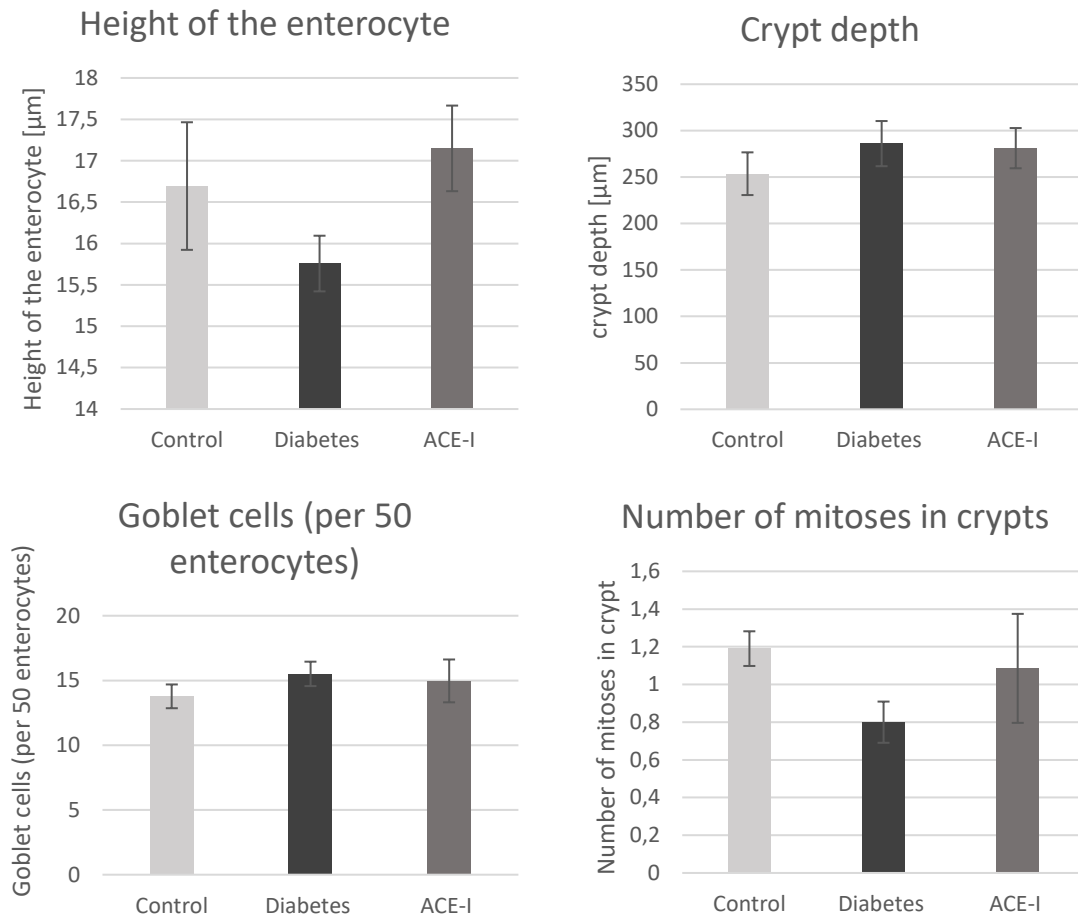

**Figure S2.** Histological morphometric analysis of the colon in rats of the control (n=7), diabetes (n=7) and ACE-I (n=7) groups. Diabetes group have been assessed 4 weeks after streptozotocin administration, ACE-I group are diabetic rats treated with enalapril for 4 weeks. Values are means  $\pm$  SE, \* -  $p < 0.05$ , by one-way ANOVA followed by Tukey's test.

**Table S1.** List of oligonucleotide primers used for RT-qPCR

| Gene          | Encoded product                                | Unique Biorad Assay ID | PCR product size [bp] | Ensembl Accession number |
|---------------|------------------------------------------------|------------------------|-----------------------|--------------------------|
|               |                                                |                        |                       |                          |
| <i>Hprt1</i>  | Hypoxanthine-guanine phosphoribosyltransferase | qRnoCED0057020         | 79                    | ENSRNOG000000031367      |
| <i>Actb</i>   | Beta-Actin                                     | qRnoCED0018219 q       | 95                    | ENSRNOG000000043292      |
| <i>Ren</i>    | Renin                                          | qRnoCID0008721         | 115                   | ENSRNOG000000002937      |
| <i>Agt</i>    | Angiotensinogen                                | qRnoCED0051666         | 95                    | ENSRNOG000000018445      |
| <i>Agtr1a</i> | Type-1A angiotensin II receptor                | qRnoCID0052626         | 68                    | ENSRNOG000000018346      |
| <i>Agtr1b</i> | Type-1B angiotensin II receptor                | qRnoCED0005729         | 90                    | ENSRNOG000000010640      |
| <i>Agtr2</i>  | Type-2 angiotensin II receptor                 | qRnoCED0007551         | 83                    | ENSRNOG000000050006      |
| <i>Gapdh</i>  | glyceraldehyde-3-phosphate dehydrogenase       | qRnoCID0057018         | 115                   | ENSRNOG000000018630      |
| <i>Mas1</i>   | Proto-oncogene Mas                             | qRnoCED0009257         | 114                   | ENSRNOG000000014971      |
